# Supplementary material for: Erythrocyte CD55 mediates the internalization of Plasmodium falciparum parasites
Source: eLife. 2021 May 24;10:e61516. doi: 10.7554/eLife.61516 (PMC8184214; doi:10.7554/eLife.61516)
Supplement: Figure 1—figure supplement 1—source data 1. [file elife-61516-fig1-figsupp1-data1.xlsx]

## Sheet: Figure 1-figure supplement 1
Figure 1-figure supplement 1: Source data
		Cell count on different days of cRBC culture
		Day 0	Day 8	Day 11	Day 13	Day 15
	CD55-CRISPR	200000	19000000	150000000	560000000	630000000
	Cas9 control	200000	24000000	230000000	390000000	940000000
