# Supplementary material for: Erythrocyte CD55 mediates the internalization of Plasmodium falciparum parasites
Source: eLife. 2021 May 24;10:e61516. doi: 10.7554/eLife.61516 (PMC8184214; doi:10.7554/eLife.61516)
Supplement: Figure 1—source data 1. [file elife-61516-fig1-data1.xlsx]

## Sheet: Fig 1C
Figure 1C source data
Expt 1	Parasitemia %	Mean parasitmeia %	Normalized to mean of pRBCs
Cas9	2.58964	2.21226	83.5741
Cas9	1.9802
Cas9	2.06693
CD55-CRISPR	1.73913	1.23984	46.8384
CD55-CRISPR	1
CD55-CRISPR	0.980392
pRBC	2.64706	2.64706	100	Only one replicate of pRBC for exp 1 and 2 (Two different batches of cRBCs used for the invasion on the same plate).
Expt 2
Cas9	3.28502	2.69598	101.848
Cas9	1.92308
Cas9	2.87984
CD55-CRISPR	1.38614	1.29974	49.1011
CD55-CRISPR	1.35922
CD55-CRISPR	1.15385
	2.64706	2.64706	100	Only one replicate of pRBC for exp 1 and 2 (Two different batches of cRBCs used for the invasion on the same plate).
Expt 3
Cas9	4.4	4.01984	120.177
Cas9	2.6
Cas9	5.05952
CD55-CRISPR	3.23529	2.78587	83.2862
CD55-CRISPR	2.47525
CD55-CRISPR	2.64706
pRBCs	3.65385	3.34493	100	Three replicates of pRBCs for exp 3 and 4 (Two different batches of cRBCs used for the invasion on the same plate)
pRBCs	3.52381
pRBCs	2.85714
Expt 4
Cas9	4.3	4.06427	121.505
Cas9	4.3
Cas9	3.59281
CD55-CRISPR	3.31707	3.18151	95.1143
CD55-CRISPR	2.6
CD55-CRISPR	3.62745
pRBCs	3.65385	3.34493	100	Three replicates of pRBCs for exp 3 and 4 (Two different batches of cRBCs used for the invasion on the same plate)
pRBCs	3.52381
pRBCs	2.85714

## Sheet: Fig 1E
Figure 1E source data
Experiment 1	Sample	Parasitemia %	Sample	Parasitemia %	Invasion efficiency for Cas9 normalized to average	Invasion efficiency for CD55 normalized to Cas9 average
DAY1 parasitemia	Cas9-1	2.22222	CD55-CRISPR-1	0.686275	102.881	31.772
	Cas9-2	2.08955	CD55-CRISPR-2	0.676328	96.7385	31.3115
	Average	2.15589
Experiment 2	Sample	Parasitemia %	Sample	Parasitemia %	Invasion efficiency for Cas9 normalized to average	Invasion efficiency for CD55 normalized to Cas9 average
DAY1 parasitemia	Cas9-1	1.2	CD55-CRISPR-1	0.29703	98.3607	24.3467
	Cas9-2	1.23	CD55-CRISPR-2	0.4	100.82	32.7869
	Average	1.215
Experiment 3	Sample	Parasitemia %	Sample	Parasitemia %	Invasion efficiency for Cas9 normalized to average	Invasion efficiency for CD55 normalized to Cas9 average
DAY1 parasitemia	Cas9-1	1.18	CD55-CRISPR-1	0.2	94.4	16
	Cas9-2	1.43	CD55-CRISPR-2	0.19	114.4	15.2
	Cas9-3	1.15	CD55-CRISPR-3	0.2	92	16
	Average	1.25333

## Sheet: Fig 1F
Figure 1F source data
		Parasite Positive	Parasite Negative
	CD55 Positive cRBCs	9	31
	CD55 Negative cRBCs	6	1550
