# Supplementary material for: Erythrocyte CD55 mediates the internalization of Plasmodium falciparum parasites
Source: eLife. 2021 May 24;10:e61516. doi: 10.7554/eLife.61516 (PMC8184214; doi:10.7554/eLife.61516)
Supplement: Figure 2—source data 1. [file elife-61516-fig2-data1.xlsx]

## Sheet: Figure 2A
Figure 2A source data
	Bio Rep 1	Raw parasitemia
			BRIC 230-1	BRIC 230-2	BRIC 110-1	BRIC 110-2	BRIC 216-1	BRIC 216-2	230/110/216-1	230/110/216-2	BRIC 170-1	BRIC 170-2
		stock	5.78	5.78	5.15	5.33	5.33	5.41	4.9	5.14	5.82	6.04
		1:10	6.95	6.46	5.51	5.5	5.55	5.36	5.38	5.47	6.41	6.17
		1:100	6.38	6.77	6.23	6.33	5.84	5.63	4.82	5.27	6.21	5.69
		1:1000	5.68	5.99	5.49	5.99	5.98	6.2	5.08	5.3	6.4	6.55
		1:10000	5.56	5.92	5.93	5.68	5.72	6.2	5.77	6.09	6.13	6.44
	Bio Rep 1	Parasitemia relative to mean of BRIC 170 control
			BRIC 230-1	BRIC 230-2	BRIC 110-1	BRIC 110-2	BRIC 216-1	BRIC 216-2	230/110/216-1	230/110/216-2	BRIC 170-1	BRIC 170-2
		stock	97.4705	97.4705	86.8465	89.882	89.882	91.231	82.6307	86.6779	98.145	101.855
		1:10	110.493	102.703	87.5994	87.4404	88.2353	85.2146	85.5326	86.9634	101.908	98.0922
		1:100	107.227	113.782	104.706	106.387	98.1513	94.6218	81.0084	88.5714	104.37	95.6303
		1:1000	87.722	92.5097	84.7876	92.5097	92.3552	95.7529	78.4556	81.8533	98.8417	101.158
		1:10000	88.4646	94.1925	94.3516	90.3739	91.0103	98.6476	91.8059	96.8974	97.5338	102.466
	Bio Rep 2	Raw parasitemia
			BRIC 230-1	BRIC 230-2	BRIC 110-1	BRIC 110-2	BRIC 216-1	BRIC 216-2	230/110/216-1	230/110/216-2	BRIC 170-1	BRIC 170-2
		stock	12.7	13	10.7	10.9	10.2	11.4	9.26	9.76	13.2	12.9
		1:10	12.6	13.6	12	13.1	10.4	11.1	9.65	10	13.5	12.4
		1:100	12.1	13	12.9	13.1	11.2	11.4	10	9.14	13	12.5
		1:1000	12.1	13.3	12.6	12.7	12.1	13.2	12.1	10.6	12.7	12.3
		1:10000	12.4	13.6	12.8	12.4	12.4	12.9	12.9	12.6	12.7	11.8
	Bio Rep 2	Parasitemia relative to mean of BRIC 170 control
			BRIC 230-1	BRIC 230-2	BRIC 110-1	BRIC 110-2	BRIC 216-1	BRIC 216-2	230/110/216-1	230/110/216-2	BRIC 170-1	BRIC 170-2
		stock	97.318	99.6169	81.9923	83.5249	78.1609	87.3563	70.9579	74.7893	101.149	98.8506
		1:10	97.2973	105.019	92.6641	101.158	80.3089	85.7143	74.5174	77.2201	104.247	95.7529
		1:100	94.902	101.961	101.176	102.745	87.8431	89.4118	78.4314	71.6863	101.961	98.0392
		1:1000	96.8	106.4	100.8	101.6	96.8	105.6	96.8	84.8	101.6	98.4
		1:10000	101.224	111.02	104.49	101.224	101.224	105.306	105.306	102.857	103.673	96.3265
	Bio Rep 3	Raw parasitemia									Bio Rep 3b
			BRIC 230-1	BRIC 230-2	BRIC 110-1	BRIC 110-2	BRIC 216-1	BRIC 216-2	BRIC 170-1	BRIC 170-2	230/110/216-1	230/110/216-2	BRIC 170-1	BRIC 170-2
		stock	1.0215	1.5315	1.1615	1.4015	1.5515	1.5615	1.5215	1.7315	1.88	2.2	3.93	3.23	3.58
		1:10	1.3815	1.1715	1.5615	1.7615	1.6115	1.8015	1.1815	1.3915	1.97	1.81	3.22	3.84	3.53
		1:100	1.2815	1.2615	1.5515	1.3915	1.4015	1.1715	1.2315	0.9915	2.06	1.99	3	3.3	3.15
		1:1000	1.5315	1.3915	1.4815	1.2115	1.6615	1.3315	1.4415	1.1915	2.06	2.31	3.1	3.6	3.35
		1:10000	1.4415	1.3615	1.4615	1.5015	1.3115	1.4015	1.2615	1.1415	2.84	2.48	2.67	3.52	3.095
	Bio Rep 3	Parasitemia relative to mean of BRIC 170 control
			BRIC 230-1	BRIC 230-2	BRIC 110-1	BRIC 110-2	BRIC 216-1	BRIC 216-2	BRIC 170-1	BRIC 170-2	230/110/216-1	230/110/216-2	BRIC 170-1	BRIC 170-2
		stock	62.8036	94.1592	71.411	86.1666	95.3889	96.0037	93.5444	106.456	46.2025	56.3291	111.076	88.9241
		1:10	107.384	91.061	121.376	136.922	125.262	140.031	91.8383	108.162	49.8392	44.6945	90.0322	109.968
		1:100	115.295	113.495	139.586	125.191	126.091	105.398	110.796	89.2038	60.0733	57.5092	94.5055	105.495
		1:1000	116.331	105.697	112.533	92.0243	126.206	101.139	109.495	90.5051	55.9727	64.5051	91.4676	108.532
		1:10000	119.975	113.317	121.64	124.969	109.155	116.646	104.689	94.7303	90.4673	77.0093	84.1121	115.888
	Bio Rep 4	Raw parasitemia
			BRIC 230-1	BRIC 230-2	BRIC 110-1	BRIC 110-2	BRIC 216-1	BRIC 216-2	230/110/216-1	230/110/216-2	BRIC 170-1	BRIC 170-2
		stock	6.79	6.15	5.8	6.61	6.24	6.38	2.66	3.37	5.6	6.9
		1:10	7.15	5.69	6.61	6.05	6.6	6.33	4.82	4.51	6.65	5.91
		1:100	6.52	6.75	7.01	6.22	2.92	6	5.61	5.17	6.39	6.32
		1:1000	7.18	7.15	6.16	5.8	6.88	6.28	6.14	6.22	6.14	6.58
		1:10000	7.14	6.2	5.5	5.84	4.86	6.19	6.74	6.39	5.94	6.62
	Bio Rep 4	Parasitemia relative to mean of BRIC 170 control
			BRIC 230-1	BRIC 230-2	BRIC 110-1	BRIC 110-2	BRIC 216-1	BRIC 216-2	230/110/216-1	230/110/216-2	BRIC 170-1	BRIC 170-2
		stock	108.64	98.4	92.8	105.76	99.84	102.08	42.56	53.92	89.6	110.4
		1:10	113.854	90.6051	105.255	96.3376	105.096	100.796	76.7516	71.8153	105.892	94.1083
		1:100	102.596	106.216	110.307	97.8757	45.9481	94.4138	88.2769	81.3533	100.551	99.4493
		1:1000	112.893	112.421	96.8553	91.195	108.176	98.7421	96.5409	97.7987	96.5409	103.459
		1:10000	113.694	98.7261	87.5796	92.9936	77.3885	98.5669	107.325	101.752	94.586	105.414

## Sheet: Figure 2B,C
Figure 2B,C source data
		Biological replicate 1							Biological replicate 2
		Untreated RBC: raw parasitemia at 72 hr							Untreated RBC: raw parasitemia at 72 hr
	Bio Rep 1		antiCD55-rep1	anti-CD55-rep 2	Isotype control-rep1	Isotype control-rep2		Bio Rep 2		antiCD55-rep1	anti-CD55-rep 2	Isotype control-rep1	Isotype control-rep2
		stock	4.32	3.94	7.91	6.94			stock	2.1345		3.1445	2.8545
		1:10	4.26	5.12	7.55	7.85			1:10	2.0445	2.1145	3.0145	2.7945
		1:100	6.43	7.2	7.34	8.1			1:100	2.2445	2.0345	3.1545	2.9945
		1:1000	6.73	8.03	8.05	8.03			1:1000	2.6745	2.7445	3.0645	3.0845
		1:10000	8.09	7.29	7.32	7.79			1:10000	3.0045	2.8445	2.9745	3.2545
		No Antibody	7.83	7.92					No Antibody	2.9445	3.0845
		Untreated RBC: parasitemia relative to no antibody							Untreated RBC: parasitemia relative to no antibody
	Bio Rep 1		antiCD55-1	antiCD55-2	Isotype control-rep1	Isotype control-rep2		Bio Rep 2		antiCD55-1	antiCD55-2	Isotype control-rep1	Isotype control-rep2
		Stock	54.8571	50.0317	100.444	88.127			stock	70.8078		104.312	94.6923
		1:10	54.0952	65.0159	95.873	99.6825			1:10	67.8222	70.1443	100	92.7019
		1:100	81.6508	91.4286	93.2063	102.857			1:100	74.4568	67.4905	104.644	99.3365
		1:1000	85.4603	101.968	102.222	101.968			1:1000	88.7212	91.0433	101.659	102.322
		1:10000	102.73	92.5714	92.9524	98.9206			1:10000	99.6683	94.3606	98.6731	107.962
		NM-treated RBC: raw parasitemia at 72 hr							NM-treated RBC: raw parasitemia at 72 hr
	Bio Rep 1		antiCD55-1	antiCD55-2	Isotype control-rep1	Isotype control-rep2		Bio Rep 2		antiCD55-1	antiCD55-2	Isotype control-rep1	Isotype control-rep2
		1:10	2.08	1.94	4.38	4.98			1:10	0.5335	0.4335	1.7535	1.5235
		1:100	3.17	2.81	5.56	5.33			1:100	0.5235	0.4935	1.7335	1.5535
		1:1000	5.32	5.05	6.2	5.51			1:1000	1.0735	1.1235	1.4835	1.4635
		1:10000	5.15	5.04	5.66	5.27			1:10000	1.7035	1.8835	1.6135	1.6735
		No Antibody	5.98	5.24					No Antibody	1.5935	1.6035
		NM-treated RBC: parasitemia relative to no antibody							NM-treated RBC: parasitemia relative to no antibody
	Bio Rep 1		antiCD55-1	antiCD55-2	Isotype control-rep1	Isotype control-rep2		Bio Rep 2		antiCD55-1	antiCD55-2	Isotype control-rep1	Isotype control-rep2
		1:10	37.0766	34.5811	78.0749	88.7701			1:10	33.375	27.1192	109.697	95.3081
		1:100	56.5062	50.0891	99.1087	95.0089			1:100	32.7495	30.8727	108.445	97.1849
		1:1000	94.8307	90.0178	110.517	98.2175			1:1000	67.1567	70.2846	92.8058	91.5546
		1:10000	91.8004	89.8396	100.891	93.9394			1:10000	106.569	117.829	100.938	104.692

## Sheet: Figure 2D
Figure 2D source data
	anti-CD55 Fab			Isotype control Fab
	Rep 1	Rep 2	Rep 3	Rep 1	Rep 2	Rep 3
Experiment 1	11.1	10.7	12	7.91	7.61	7.86
Experiment 2	8.94	8.91	9.67	5.27	4.72	4.97
