# Supplementary material for: Erythrocyte CD55 mediates the internalization of Plasmodium falciparum parasites
Source: eLife. 2021 May 24;10:e61516. doi: 10.7554/eLife.61516 (PMC8184214; doi:10.7554/eLife.61516)
Supplement: Figure 3—source data 1. [file elife-61516-fig3-data1.xlsx]

## Sheet: Fig 3B
Figure 3B source data
	Number of merozoite-RBC contacts from each egress
	IgG	Anti-CD55 ab
	16	22
	25	26
	13	24
	18	25
	24	22
	14	23
	13	15
	28	32
	25	18
	23	15
	31	28
	35	33
	31	29
	21
	28

## Sheet: Fig 3C
Figure 3C source data
	Antibody	IgG isotype control			anti-CD55
		Number of invasion	Total contacts	Invasion efficiency (%)	Number of invasion	Total contacts	Invasion efficiency (%)
	1st expt	16	96	16.6667	8	97	8.24742
	2nd expt	7	80	8.75	2	60	3.33333
	3rd expt	30	169	17.7515	11	155	7.09677
	Total	53	345	15.3623	21	312	6.73077

## Sheet: Fig 3D
Figure 3D source data
		Number of invasion per egress in presence of IgG control or anti-CD55 ab
		IgG (n=15)	anti-CD55 (n=13)	n=number of egress
		2	3
		5	3
		2	1
		4	1
		3	2
		3	0
		2	0
		2	3
		0	1
		7	2
		4	2
		9	3
		5	0
		4
		1
	Total invasion	53	21

## Sheet: Fig 3E
Figure 3E source data
	Preinvasion time (s) in presence of IgG control or anti-CD55 ab
	IgG	Anti-CD55
	11.2	14.4
	19	13
	13.6	15.8
	10.6	20.2
	11.8	9.8
	9.8	18.2
	15.4	18.2
	21.2	20.2
	14.2	8
	11.6	11.8
	14	16.2
	11	15
	15.8	10.2
	20	13
	21.8	21.6
	23.2	10
	26.4	8.8
	10.4	19.8
	16.4	13.8
	20.8
	12
	14
	20
	16
	15
	14
	22
	20.8
	20
	14
	15.6
	16.4
	10
	10.2
	18.2
	10
	17
	36
	28
	11
	14.6
	28
	8.8
	13
	14.2
	13.6
	11
	12
	9
	18.4
	25.6

## Sheet: Fig 3F
Figure 3F source data
	Time taken for internalization (s) in presence of IgG or anti-CD55 ab
	IgG	Anti-CD55
	5.6	14
	9.6	12.4
	13.4	7
	10	8.4
	9	11.2
	9	6.8
	7.8	6.4
	9.6	12
	12.2	6.8
	6.6	12.8
	11.6	13.4
	10.2	8
	7.6	5
	13.8	11.8
	7.4	8.4
	4.4	8
	6	6.6
	4.4	7
	10.4	5.6
	6.4	12
	6.8	6
	13
	8
	6
	7
	6
	15
	9.4
	10
	13
	5
	6
	10
	6
	7.8
	9
	6.4
	16
	4.8
	9
	9.8
	8
	8.4
	9.2
	9
	9.4
	5.2
	10
	8
	12.4
	6

## Sheet: Fig 3G
Figure 3G source data
	Time to echinocytosis (s) in presence of IgG or anti-CD55 ab
	IgG	Anti-CD55
	45.6	52
	45.8	33.4
	36.2	44
	52	43
	40.8	39.6
	41	32
	44.6	41.8
	40	68
	74.4	53.6
	65	48
	64.8	43.8
	44.8	36.2
	48.2	47.6
	41	49.4
	47	44.4
	45	38
	39	39.8
	31	50.8
	38
	33
	35
	38.8
	41
	41
	40.2
	39.2
	24
	39.6
	34.2
	42
