# Supplementary material for: Erythrocyte CD55 mediates the internalization of Plasmodium falciparum parasites
Source: eLife. 2021 May 24;10:e61516. doi: 10.7554/eLife.61516 (PMC8184214; doi:10.7554/eLife.61516)
Supplement: Figure 4—source data 1. [file elife-61516-fig4-data1.xlsx]

## Sheet: Fig 4A
Figure 4A source data
% of deformation out of total contacts
	IgG isotype control									anti-CD55
	Total contacts	1 deg deform	% 1 deg deform	2 deg deform	% 2 deg deform	3 deg deform	% 3 deg deform	Total deform	% deform out of total contacts	Total contacts	1 deg deform	% 1 deg	2 deg deform	% 2 deg	3 deg deform	% 3 deg	Total deform	% deform out of total contacts
1st expt	96	19	38	22	44	9	18	50	52.0833	97	29	47.541	20	32.7869	12	19.6721	61	62.8866
2nd expt	80	35	67.3077	13	25	4	7.69231	52	65	60	20	43.4783	21	45.6522	5	10.8696	46	76.6667
3rd expt	169	50	54.3478	34	36.9565	8	8.69565	92	54.4379	155	58	61.0526	30	31.5789	7	7.36842	95	61.2903

## Sheet: Fig 4B
Figure 4B source data
	Length of deformation (s) in presence of IgG or anti-CD55 ab
	IgG	Anti-CD55
	4.6	5.8
	11.4	5.8
	7.4	9.6
	7.4	8.6
	5.4	5.8
	4.2	11.4
	8.4	9.8
	14.6	12.4
	10.8	5.6
	8	3.6
	8.6	8
	4.8	4
	11	4
	8	5
	11.8	10.6
	20.2	1.6
	15.4	3.4
	6.8	11.6
	8.2	9
	17.6
	8.2
	6
	10
	8
	8
	7
	7
	7
	11
	4.4
	8.8
	10
	3.2
	6.4
	7.4
	4.8
	13
	28.8
	18.4
	7.2
	10
	22
	3.4
	7.4
	4.6
	5.8
	7.6
	7
	4.6
	9.8
	17.8

## Sheet: Fig 4C
Figure 4C source data
	% of different degree of deformation out of successful invasions
		IgG isotype control							Anti-CD55
		Total invasion	1 deg deform	% 1 deg	2 deg deform	% 2 deg	3 deg deform	% 3 deg	Total invasion	1 deg deform	% 1 deg	2 deg deform	% 2 deg	3 deg deform	% 3 deg
	1st expt	16	0	0	9	56.25	7	43.75	8	0	0	0	0	8	100
	2nd expt	7	0	0	3	42.8571	4	57.1429	2	0	0	1	50	1	50
	3rd expt	30	2	6.66667	21	70	7	23.3333	9	1	11.1111	7	77.7778	1	11.1111
		53	2	3.77358	33	62.2642	18	33.9623	19	1	5.26316	8	42.1053	10	52.6316	Note: Two invasions with unknown deform in expt 3 were excluded

## Sheet: Fig 4D
Figure 4D source data
	% of different degree of deformation out of failed invasions
		IgG isotype control								Anti-CD55 antibody
		Total failed invasion	1 deg deform	% 1 deg	2 deg deform	% 2 deg	3 deg deform	% 3 deg	% 0 deg deform	Total failed invasion	1 deg deform	% 1 deg	2 deg deform	% 2 deg	3 deg deform	% 3 deg	% 0 deg deform
	1st expt	80	19	23.75	13	16.25	2	2.5	57.5	89	29	32.5843	20	22.4719	4	4.49438	40.4494
	2nd expt	73	35	47.9452	10	13.6986	0	0	38.3562	58	20	34.4828	20	34.4828	4	6.89655	24.1379
	3rd expt	139	48	34.5324	13	9.35252	1	0.719424	55.3957	144	57	39.5833	23	15.9722	6	4.16667	40.2778
		292	102	34.9315	36	12.3288	3	1.0274	51.7123	291	106	36.4261	63	21.6495	14	4.811	37.1134
