# Supplementary material for: Erythrocyte CD55 mediates the internalization of Plasmodium falciparum parasites
Source: eLife. 2021 May 24;10:e61516. doi: 10.7554/eLife.61516 (PMC8184214; doi:10.7554/eLife.61516)
Supplement: Figure 5—figure supplement 1—source data 1. [file elife-61516-fig5-figsupp1-data1.xlsx]

## Sheet: Figure 5-figure supplement 1
Figure 5-figure supplement 1: Source data
		Raw Parasitemia %			Parasitemia normalized for uninfected control
		Rep 1	Rep 2	Rep 3	Rep 1	Rep 2	Rep 3
	CD55-null pRBCs	1.08	1.18	1.05	0.58	0.68	0.55
	Control WT pRBCs	3.32	3.44	3.45	2.82	2.94	2.95
	Fresh pRBCs	5.48	5.49	5.27	4.98	4.99	4.77
	Uninfected	0.5
