# Supplementary material for: Erythrocyte CD55 mediates the internalization of Plasmodium falciparum parasites
Source: eLife. 2021 May 24;10:e61516. doi: 10.7554/eLife.61516 (PMC8184214; doi:10.7554/eLife.61516)
Supplement: Figure 5—source data 1. [file elife-61516-fig5-data1.xlsx]

## Sheet: Fig 5A
Figure 5A source data
		Control pRBCs			CD55-null pRBCs
		Invasion	Total contacts	% invasion	Invasion	Total contacts	% invasion
	1st expt	1	16	6.25	0	101	0
	2nd expt	16	125	12.8	0	82	0
	3rd expt	8	56	14.2857	0	127	0
	Total	25	197	12.6904	0	310	0

## Sheet: Fig 5B
Figure 5B source data
	Number of merozoite-RBC contacts from each egress
	Control pRBCs	CD55 null pRBCs
	7	11
	3	10
	6	8
	8	14
	12	3
	8	12
	9	7
	13	16
	6	7
	11	13
	14	12
	5	17
	9	14
	11	11
	19	9
	20	12
	12	7
	14	12
	10	31
		16
		12
		14
		11
		13
		18

## Sheet: FIg 5C
Figure 5C source data
% of deformation out of total contacts
	Control pRBCs						CD55 null pRBCs
	Total contacts	1 deg deform	2 deg deform	3 deg deform	Total deform	% deform out of total contacts	Total contacts	1 deg deform	2 deg deform	3 deg deform	Total deform	% deform out of total contacts
1st expt	16	2	4	2	8	50	101	31	15	7	53	52.4752
2nd expt	125	23	16	7	46	36.8	82	38	8	0	46	56.0976
3rd expt	56	11	9	2	22	39.2857	127	30	9	1	40	31.4961
Total	197	36	29	11	76	38.5787	310	99	32	8	139	44.8387

## Sheet: Fig 5D
Figure 5D source data
	% of diff deformation out of failed invasions
		Control pRBCs									CD55-null pRBCs
		Total failed invasion	0 deg deform	% 0 deg deform	1 deg deform	% 1 deg deform	2 deg deform	% 2 deg deform	3 deg deform	% 3 deg deform	Total failed invasion	0 deg deform	% 0 deg deform	1 deg deform	% 1 deg deform	2 deg deform	% 2 deg deform	3 deg deform	% 3 deg deform
	1st expt	15	8	53.3333	2	13.3333	4	26.6667	1	6.66667	101	48	47.5248	31	30.6931	15	14.8515	7	6.93069
	2nd expt	109	79	72.4771	21	19.2661	8	7.33945	1	0.917431	82	36	43.9024	38	46.3415	8	9.7561	0	0
	3rd expt	48	34	70.8333	10	20.8333	4	8.33333	0	0	127	87	68.5039	30	23.622	9	7.08661	1	0.787402
	Total	172	121	70.3488	33	19.186	16	9.30233	2	1.16279	310	171	55.1613	99	31.9355	32	10.3226	8	2.58065
