# Supplementary material for: Erythrocyte CD55 mediates the internalization of Plasmodium falciparum parasites
Source: eLife. 2021 May 24;10:e61516. doi: 10.7554/eLife.61516 (PMC8184214; doi:10.7554/eLife.61516)
Supplement: Figure 6—source data 1. [file elife-61516-fig6-data1.xlsx]

## Sheet: Fig 6C
Figure 6C source data
Name of egress event	RBCs attached to at least one merozoite	Echinocytosis	Echinocytosis %	No Echinocytosis
Anti-CD55-1	9	7	77.7778	2
Anti-CD55-2	8	6	75	2
Anti-CD55-3	3	1	33.3333	2
Anti-CD55-4	2	1	50	1
Anti-CD55-5	2	0	0	2
Anti-CD55-6	6	2	33.3333	4
Anti-CD55-7	6	4	66.6667	2
Anti-CD55-8	8	4	50	4
Total	44	25	56.8182	19
IgG control-1	7	5	71.4286	2
IgG control-2	5	3	60	2
IgG control-3	8	7	87.5	1
IgG control-3.1	5	2	40	3
IgG control-4	5	4	80	1
IgG control-4.1	10	5	50	5
IgG control-5	6	4	66.6667	2
IgG control-6	7	4	57.1429	3
Total	53	34	64.1509	19

## Sheet: Fig 6D
Figure 6D source data
Video file name/ egree name	RBC attached to at least one merozoite	Echinocytosis	Echinocytosis %	No echinocytosis
WT-1_crop_1-10-21	4	1	25	3
WT-1_crop_1-12-21_egress70	6	1	16.6667	5
wt-2_crop_1-12-21_egress1150	13	2	15.3846	11
WT-1_crop_egress440_1-14-21	9	2	22.2222	7
WT-2-egress_just_prior_to movie_crop_1-14-21	10	6	60	4
WT-3_egress_just_prior_to_movie_crop_1-14-21	9	1	11.1111	8
WT-4_crop_egress285_1-14-21	8	1	12.5	7
wt-1_crop_egress782_1-15-21	7	5	71.4286	2
WT-1_crop_egress778_1-19-21	11	6	54.5455	5
WT-2_crop_Egress_just_prior_to_3067_1-19-21	7	3	42.8571	4
Total	84	28	33.3333
IFC-1_crop_1-10-21_12	4	2	50	2
IFC-2_crop_1-10-21_egress1755	3	0	0	3
IFC-3_crop_1-10-21_egress2130	2	0	0	2
IFC-4_crop_1-10-21_egress2800	1	0	0	1	2 attachments to distorted cell
IFC-3_crop_1-12-21_egress971	3	0	0	3
IFC-4_crop_1-12-21_egress540	1	0	0	1	1 attachments to distorted cell
egress from 19-IFC-20_1-12-2021_crp_bs	2	0	0	2
IFC-1_crop_egress358_1-14-21	3	0	0	3
IFC-2_crop_egress450_1-14-21	5	3	60	2
IFC-3_crop_egress1324_1-14-21	2	0	0	2
IFC-4_crop_egress32_1-14-21	3	1	33.3333	2
IFC-5_crop_egress_just_prior_1-14-21	4	0	0	4
IFC-6_crop_egress2330_1-14-21	4	0	0	4
IFC-7_crop_egress590_1-14-21	4	1	25	3
IFC-1_crop_egress190_1-15-21	4	0	0	4
IFC-2_crop_egress2292_1-15-21	5	2	40	3
IFC-3_crop_egress1240_1-15-21	2	0	0	2
IFC-1_crop_egress193_1-19-21	1	0	0	1
Total	53	9	16.9811
