# Supplementary material for: Erythrocyte CD55 mediates the internalization of Plasmodium falciparum parasites
Source: eLife. 2021 May 24;10:e61516. doi: 10.7554/eLife.61516 (PMC8184214; doi:10.7554/eLife.61516)
Supplement: Figure 7—source data 1. [file elife-61516-fig7-data1.xlsx]

## Sheet: Figure 7A
Figure 7A source data
Experiment 1	Ring attached %
	CytD	Heparin	No parasite
CD55 null pRBCs	1.97	1.38	0.69
Control pRBCs	2.28	0.81	0.69
Corrected for no parasites
	CytD	Heparin
CD55 null pRBCs	1.28	0.69
Control pRBCs	1.59	0.12
Corrected for heparin
	CytD
CD55 null pRBCs	0.59
Control pRBCs	1.47
Experiment 2	Ring attached %
	CytD	Heparin	No parasite
CD55 null pRBCs	2.11	0.98	0.6
Control pRBCs	2.45	0.97	0.55
Corrected for no parasites
	CytD	Heparin
CD55 null pRBCs	1.51	0.38
Control pRBCs	1.9	0.42
Corrected for heparin
	CytD
CD55 null pRBCs	1.13
Control pRBCs	1.48
Experiment 3	Ring attached %
	CytD	Heparin	No parasite
CD55 null pRBCs	1.87	1.14	0.078
Control pRBCs	2.54	1.14	0.1
Corrected for no parasites
	CytD	Heparin
CD55 null pRBCs	1.792	1.062
Control pRBCs	2.44	1.04
Corrected for heparin
	CytD
CD55 null pRBCs	0.73
Control pRBCs	1.4
	Attachment data combined		CytD 2uM
	Time following attachment: 2h
	Sample	Attachement calculated	Normalized to control average
	CD55 null-expt1	0.59	40.6897
	CD55 null-expt2	1.13	77.931
	CD55 null-expt3	0.73	50.3448
	Control-expt1	1.47	101.379
	Control-expt2	1.48	102.069
	Control-expt3	1.4	96.5517
	Control Average	1.45

## Sheet: Figure 7B&D
Figure 7B&D source data
	Total merozoite-control pRBCs interactions/attachments	20	Percentage
	Apical orientation out of total attachment	17	85
	Indeterminate orientation out of total attachment	1	5
	At early invasion (no indentation) out of total apical orientation	9	52.9412
	At mid invasion (indentation) out of total apical orientation	8	47.0588
	Non Apical orientation out of total attachment	2	10
	Apical colocalization of AMA1 and RON4 out of total apical orientation	17	100
	Total merozoite-CD55 null pRBCs interactions/attachments	27	Percentage
	Apical orientation out of total attachment	11	40.7407
	Indeterminate orientation out of total attachment	2	7.40741
	At early invasion (no indentation) out of total apical orientation	11	100
	At mid invasion (indentation) out of total apical orientation	0	0
	Non apical orientation out of total attachment	14	51.8519
	Apical colocalization of AMA1 and RON4 out of total apical orientation	11	100

## Sheet: Figure 7E
Figure 7E source data
	Attachment assays in previously cryopreserved RBCs, Figure 7E
		Bio Rep 1
			No CytD		CytD		Heparin		No parasites
			Rep-1	Rep-2	Rep-1	Rep-2	Rep-1	Rep-2	Rep-1	Rep-2
		WT	2.76	2.74	1.44	1.46	0.73	0.69	0.072	0.047
		WT_R1 peptide	N.D.	N.D.	0.079	0.8	1.37	1.58	0.072	0.047
		CD55-null	2.65	2.56	1.35	1.33	0.95	0.96	0.2	0.16
		Corrected for no parasites and heparin
			No CytD		CytD
			Rep-1	Rep-2	Rep-1	Rep-2
		WT	2.03	2.05	0.71	0.77
		WT_R1 peptide	N.D.	N.D.	-1.291	-0.78
		CD55-null	1.7	1.6	0.4	0.37
		Attachment efficiency relative to WT cells
			Rep-1	Rep-2
		WT	100	100
		WT_R1 peptide	0	0
		CD55-null	56	48.05
		Bio Rep 2
			No CytD		CytD		Heparin		No parasites
			Rep-1	Rep-2	Rep-1	Rep-2	Rep-1	Rep-2	Rep-1	Rep-2
		WT	2.89	3.13	1.98	1.92	0.97	0.92	0.058	0.047
		WT_R1 peptide	N.D.	N.D.	1.1	1.01	1.69	1.52	0.058	0.047
		CD55-null	2.55	2	1.84	1.75	0.92	1.12	0.17	0.13
		Corrected for no parasites and heparin
			No CytD		CytD
			Rep-1	Rep-2	Rep-1	Rep-2
		WT	1.92	2.21	1.01	1
		WT_R1 peptide	N.D.	N.D.	-0.59	-0.51
		CD55-null	1.63	0.88	0.92	0.63
		Attachment efficiency relative to WT cells
			Rep-1	Rep-2
		WT	100	100
		WT_R1 peptide	0	0
		CD55-null	91	63
