# Supplementary material for: Erythrocyte CD55 mediates the internalization of Plasmodium falciparum parasites
Source: eLife journal article supplement (doi:10.7554/elife.61516), 2021-05-24
Supplement: supp [file elife-61516-supp-v1.zip]

A

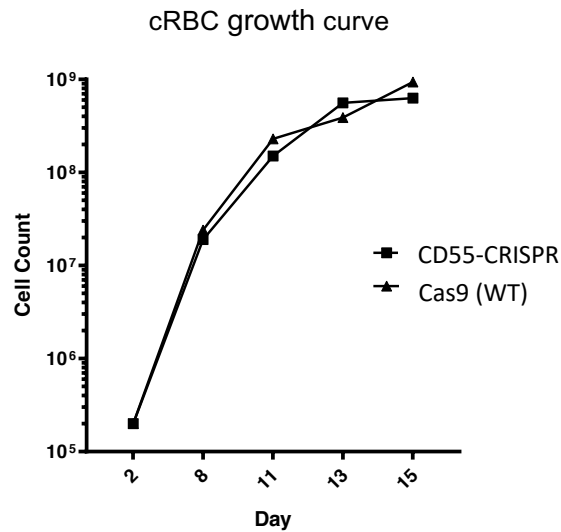

B

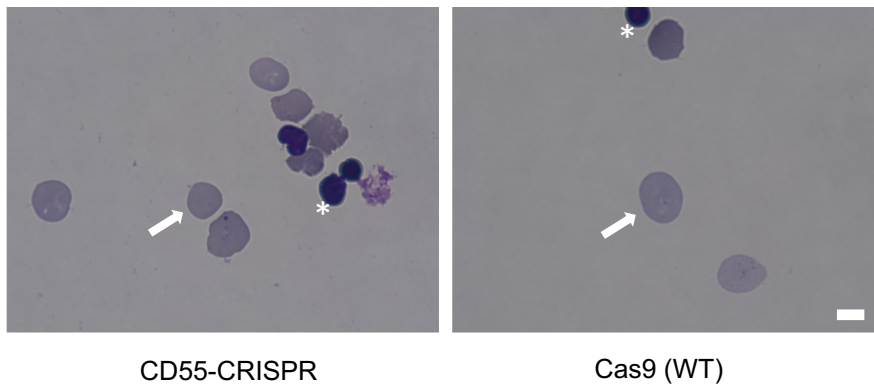

**Figure S1: Deletion of *CD55* does not impact growth or maturation of cRBCs derived from CD34<sup>+</sup> primary human HSPCs.** (A) Growth rate of *CD55*-null erythroid progenitors from CD34<sup>+</sup> HSPCs over 15 days of differentiation, compared to isogenic wild-type cells. Results are from one representative experiment. (B) Day 20 cRBCs stained with May-Grünwald and Giemsa, and visualized by light microscopy. Enucleation rate of ~90.0% was observed in both *CD55*-null and Cas9 (WT) cRBCs. White arrows indicate enucleated cells. Asterisks indicate free nuclei. Scale bar 5  $\mu$ M.
