# Supplementary material for: Erythrocyte CD55 mediates the internalization of Plasmodium falciparum parasites
Source: eLife journal article supplement (doi:10.7554/elife.61516), 2021-05-24
Supplement: supp [file elife-61516-supp-v1.zip]

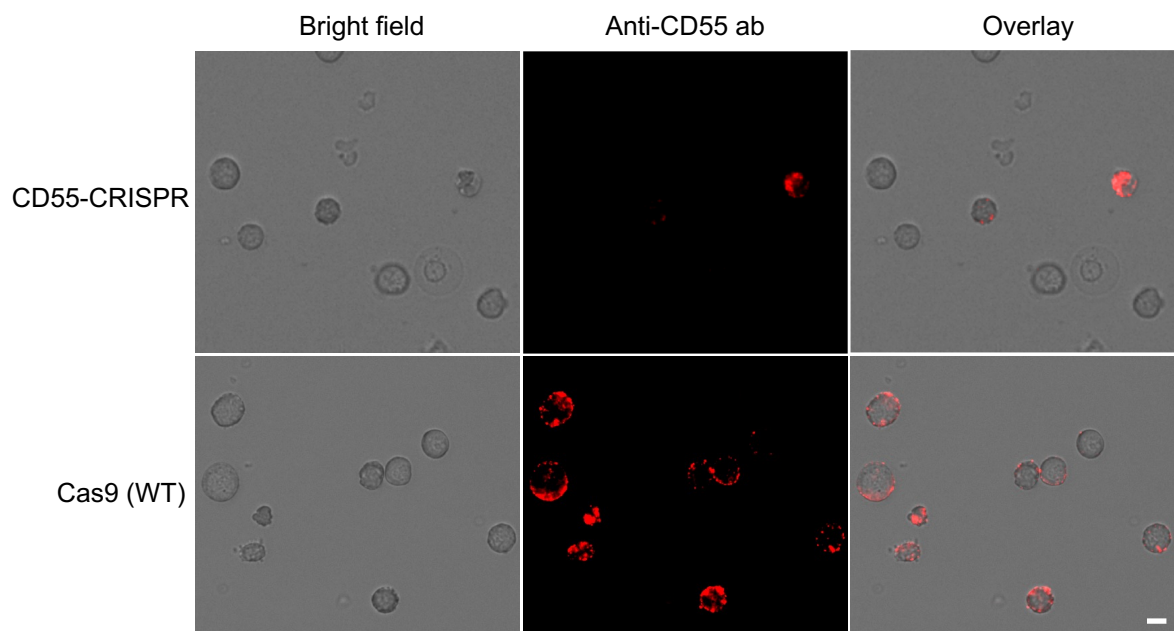

**Figure S2: Expression of CD55 on cRBCs.** Immunofluorescence assays showing the expression of CD55 on the surface of CD55-CRISPR and Cas9 (WT) cRBCs using anti-CD55-PE antibody. Scale bar 5  $\mu$ M.
