# Supplementary material for: Erythrocyte CD55 mediates the internalization of Plasmodium falciparum parasites
Source: eLife journal article supplement (doi:10.7554/elife.61516), 2021-05-24
Supplement: supp [file elife-61516-supp-v1.zip]

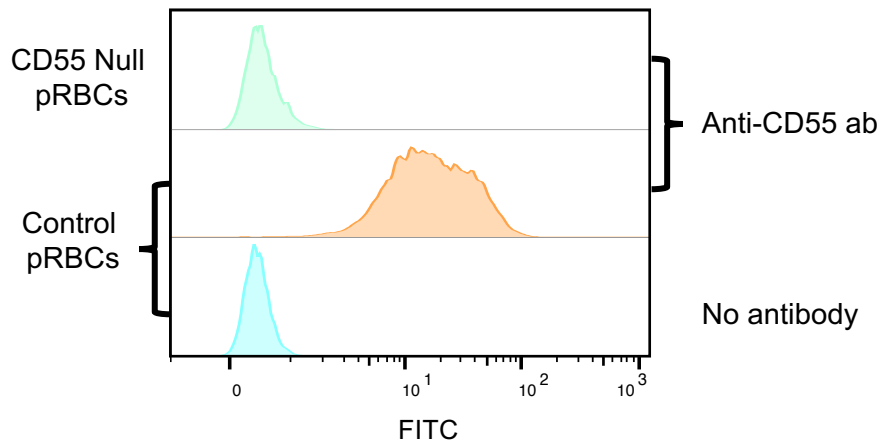

**Figure S5: Specificity of rabbit polyclonal anti-CD55 antibody.** Flow cytometric analysis of control and CD55-null RBCs incubated with rabbit polyclonal anti-CD55 antibody. The anti-CD55 polyclonal antibody detects CD55 on wild-type pRBCs but not CD55-null RBCs.
