# Supplementary material for: Erythrocyte CD55 mediates the internalization of Plasmodium falciparum parasites
Source: eLife journal article supplement (doi:10.7554/elife.61516), 2021-05-24
Supplement: supp [file elife-61516-supp-v1.zip]

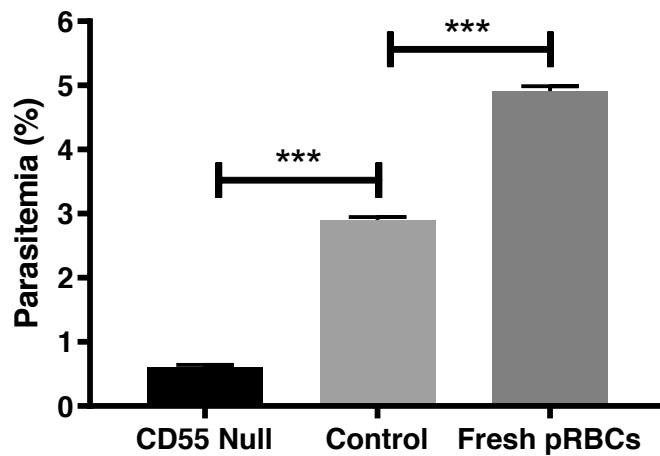

**Figure S6: CD55-null pRBCs are refractory to invasion by *P. falciparum*.** Invasion efficiency of *P. falciparum* strain 3D7 in previously cryopreserved CD55-null pRBCs from rare Inab donor, control wild-type pRBCs that had been similarly cryopreserved, or fresh pRBCs. n=3 technical replicates, error bars indicate SD; \*\*\*, p<0.05.
