# Supplementary material for: Erythrocyte CD55 mediates the internalization of Plasmodium falciparum parasites
Source: eLife journal article supplement (doi:10.7554/elife.61516), 2021-05-24
Supplement: supp [file elife-61516-supp-v1.zip]

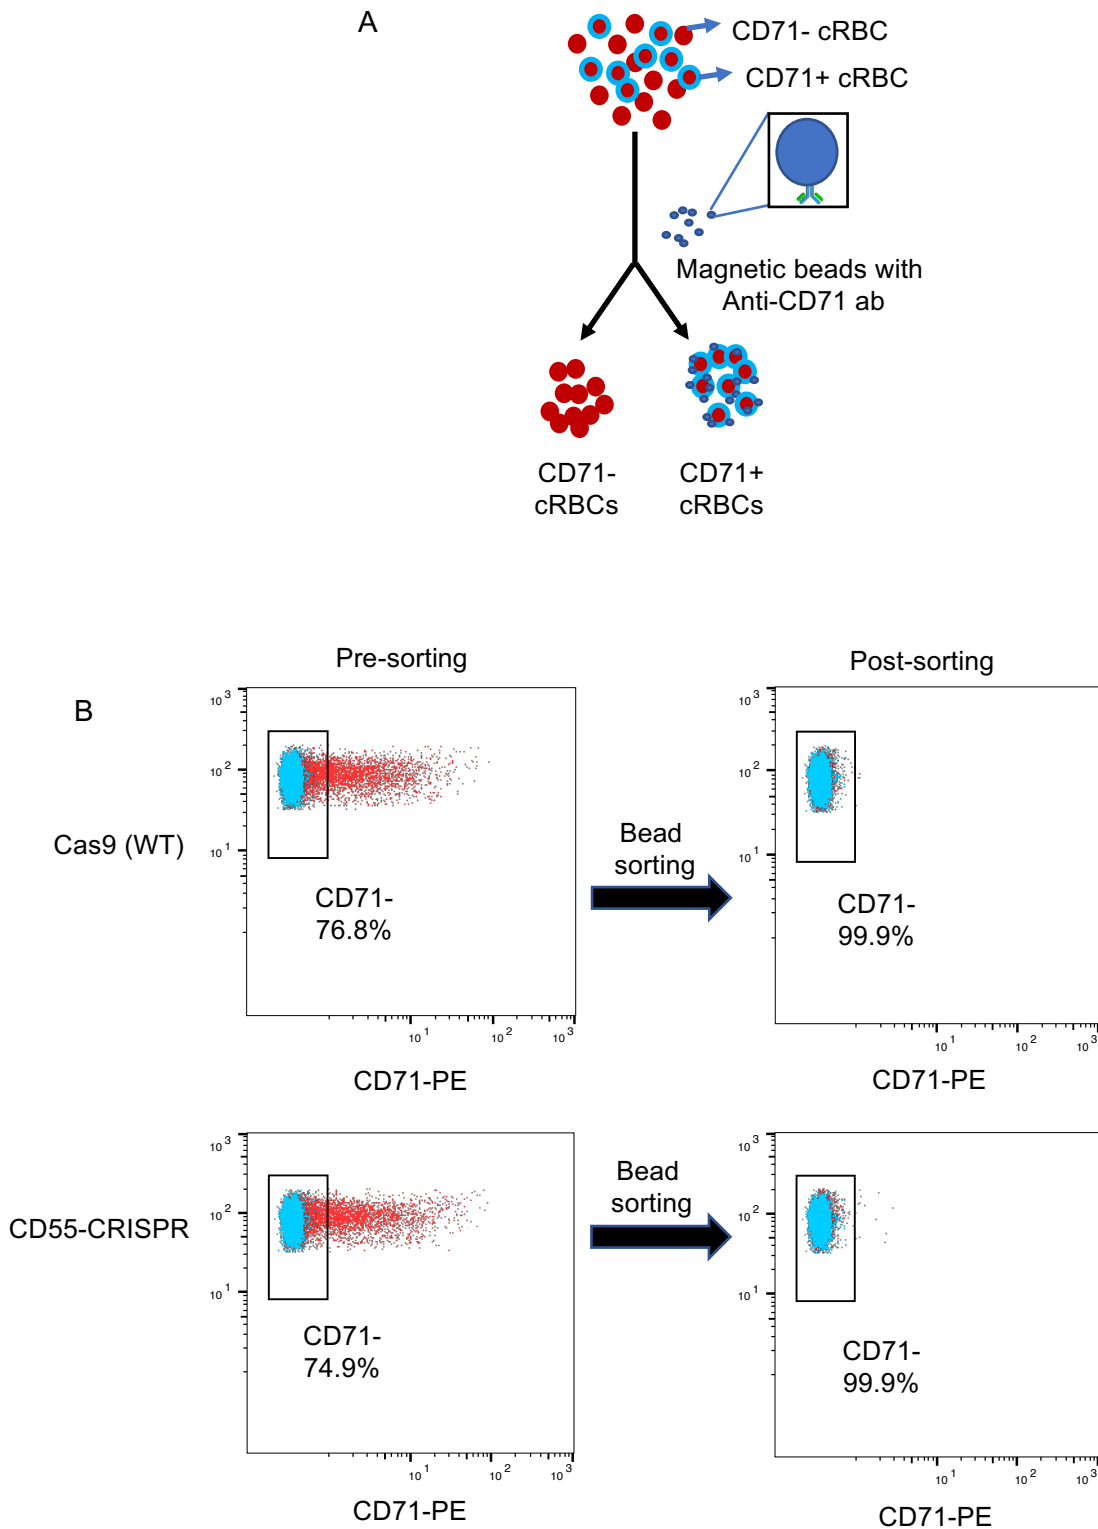

**Figure S4: Enrichment of CD71- cRBCs by immunolabeled magnetic beads.** (A) Schematic showing the separation of CD71+ cRBCs from CD71- cRBCs using anti-CD71 antibody-immobilized magnetic beads. (B) Flow cytometric analysis of CD71 expression on cRBCs pre- and post- sorting using anti-CD71 antibody-immobilized magnetic beads.
