# Supplementary material for: Erythrocyte CD55 mediates the internalization of Plasmodium falciparum parasites
Source: eLife journal article supplement (doi:10.7554/elife.61516), 2021-05-24
Supplement: supp [file elife-61516-supp-v1.zip]

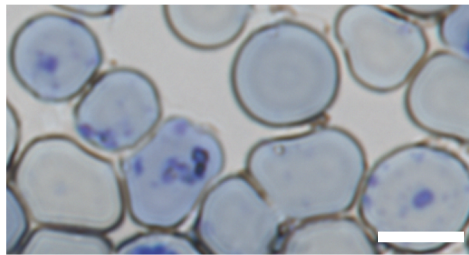

**Figure S3: Reticulocyte staining of day 17 cRBCs.**

Reticulocytes are indicated by the purple reticular staining pattern. Scale bar 5  $\mu$ M.
